# Supplementary material
Source: Springer Nature journal article supplement (https://www.springermedizin.de/resource/supplementary/12885_2014_5244_MOESM3_ESM.pdf/9467084)

**Treatment**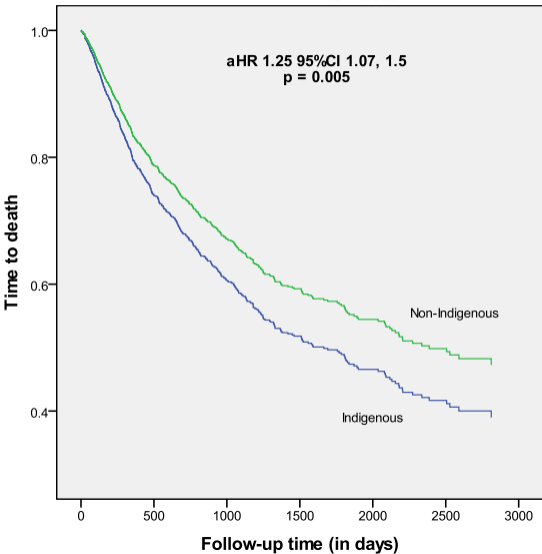**No Treatment**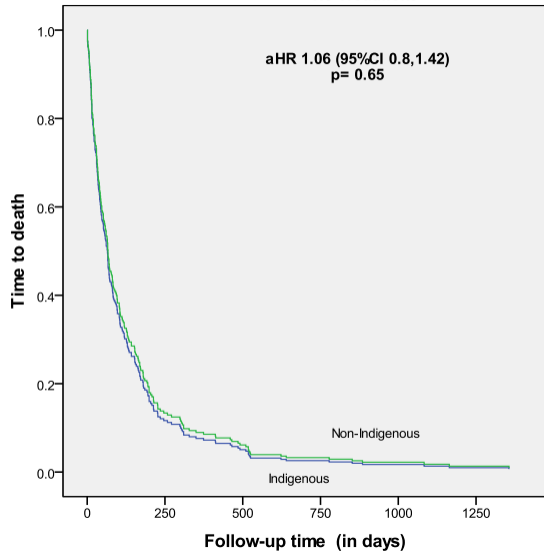

Supplement: MOESM3 [file 9467084]
